# Supplementary material for: Response Format, Not Semantic Activation, Influences the Failed Retrieval Effect
Source: PubMed Central journal article supplement (PMC6459060; doi:10.3389/fpsyg.2019.00599), 2019-04-04
Supplement: Data_Sheet_1.pdf [file Data_Sheet_1.pdf]

## Supplementary Material

### Response Format, Not Semantic Activation, Influences the Failed Retrieval Effect

Saeko Tanaka\*, Makoto Miyatani, Nobuyoshi Iwaki

\* **Correspondence:** Saeko Tanaka: saekot2356@gmail.com

**Supplementary Table 1.** List of stimuli used in this study. During the experiments, we presented Japanese words at the top of each cell, with their English translation shown in parentheses below them.

| cue word                 | target word          | cue word               | target word       | cue word        | target word        |
|--------------------------|----------------------|------------------------|-------------------|-----------------|--------------------|
| 赤字<br>(deficit)          | 借金<br>(debt)         | 世論<br>(public opinion) | 世間<br>(society)   | カエル<br>(frog)   | 雨<br>(rain)        |
| 移民<br>(immigration)      | 難民<br>(refugees)     | 論理<br>(logic)          | 理屈<br>(reason)    | カルタ<br>(karuta) | 遊び<br>(play)       |
| 汚染<br>(pollution)        | 川<br>(river)         | いかだ<br>(raft)          | 遭難<br>(distress)  | ゲスト<br>(guests) | 招待<br>(invitation) |
| 親子<br>(parent and child) | 関係<br>(relationship) | いのち<br>(life)          | 人間<br>(human)     | コイン<br>(coin)   | スロット<br>(slot)     |
| 会議<br>(conference)       | 討論<br>(debate)       | うどん<br>(udon)          | きつね<br>(fox)      | コラム<br>(column) | 本<br>(book)        |
| 価格<br>(price)            | 商品<br>(product)      | えくぼ<br>(dimple)        | 頬<br>(cheek)      | サウナ<br>(sauna)  | 熱<br>(heat)        |
| 科学<br>(science)          | 進歩<br>(progress)     | おかず<br>(side dish)     | 弁当<br>(box lunch) | シルク<br>(silk)   | 高級<br>(high class) |

Supplementary Material

|                       |                   |                            |                         |                        |                      |
|-----------------------|-------------------|----------------------------|-------------------------|------------------------|----------------------|
| 火災<br>(fire)          | 炎<br>(flame)      | おとこ<br>(man)               | 筋肉<br>(muscle)          | スパイ<br>(spy)           | 敵<br>(enemy)         |
| 家庭<br>(home)          | 円満<br>(amicable)  | おなか<br>(stomach)           | 背中<br>(back)            | スリル<br>(thrill)        | 映画<br>(movies)       |
| 看護<br>(nurse)         | 医療<br>(medical)   | おむつ<br>(diapers)           | 子供<br>(child)           | チーズ<br>(cheese)        | ピザ<br>(pizza)        |
| 管理<br>(management)    | かぎ<br>(key)       | かかと<br>(heel)              | くつ<br>(shoes)           | テスト<br>(test)          | 期末<br>(term-end)     |
| 機械<br>(machine)       | 精密<br>(precision) | かたち<br>(form)              | 積み木<br>(building block) | テニス<br>(tennis)        | 運動<br>(motion)       |
| 苦勞<br>(hardship)      | 労働<br>(labor)     | かばん<br>(bag)               | 通学<br>(go to school)    | テラス<br>(terrace)       | 家<br>(house)         |
| 検査<br>(inspection)    | 健康<br>(health)    | さかな<br>(fish)              | うろこ<br>(scales)         | ドレス<br>(dress)         | 女性<br>(woman)        |
| 権利<br>(right)         | 国民<br>(people)    | せりふ<br>(dialogue)          | 演劇<br>(theater)         | ネオン<br>(neon)          | 夜景<br>(night view)   |
| 古典<br>(classic)       | 昔<br>(old days)   | たばこ<br>(tobacco)           | 害<br>(harm)             | バイク<br>(bike)          | タイヤ<br>(tire)        |
| 資格<br>(qualification) | 英検<br>(eiken)     | だるま<br>(dharma)            | 選挙<br>(election)        | バイト<br>(part-time job) | 時給<br>(hourly wage)  |
| 刺激<br>(stimulation)   | 感覚<br>(sense)     | だんご<br>(dango)             | くし<br>(comb)            | パイプ<br>(pipe)          | 水道<br>(water supply) |
| 資源<br>(resource)      | 有限<br>(limited)   | たんす<br>(chests of drawers) | ひきだし<br>(drawer)        | バケツ<br>(bucket)        | リレー<br>(relay)       |
| 思考<br>(thought)       | 停止<br>(stop)      | つくえ<br>(desk)              | 教室<br>(classroom)       | パズル<br>(puzzle)        | 難解<br>(esoteric)     |

|                    |                         |                   |                   |                         |                     |
|--------------------|-------------------------|-------------------|-------------------|-------------------------|---------------------|
| 自信<br>(confidence) | 喪失<br>(loss)            | とうふ<br>(tofu)     | 豆<br>(beans)      | ビール<br>(beer)           | 大人<br>(adult)       |
| 自然<br>(nature)     | 森林<br>(forest)          | となり<br>(next)     | 友達<br>(friend)    | ビデオ<br>(video)          | 映像<br>(image)       |
| 時代<br>(age)        | 戦国<br>(Sengoku)         | にきび<br>(acne)     | 青春<br>(youth)     | ポンプ<br>(pump)           | 空気<br>(air)         |
| 深夜<br>(late night) | 徘徊<br>(loitering)       | のれん<br>(goodwill) | 布<br>(cloth)      | マイク<br>(microphone)     | 音声<br>(voice)       |
| 心理<br>(mind)       | 学問<br>(learning)        | はかま<br>(hakama)   | 着物<br>(kimono)    | ミイラ<br>(mummy)          | 死体<br>(cadaver)     |
| 世界<br>(world)      | 国<br>(country)          | はさみ<br>(scissors) | 刃物<br>(knife)     | ミシン<br>(sewing machine) | ぬいもの<br>(sewing)    |
| 危険<br>(danger)     | 安全<br>(safety)          | はんこ<br>(penchant) | 名前<br>(name)      | モグラ<br>(mole)           | 地中<br>(underground) |
| 知識<br>(knowledge)  | 頭脳<br>(brain)           | ふすま<br>(bran)     | たたみ<br>(tatami)   | モデル<br>(model)          | ファッション<br>(fashion) |
| 手紙<br>(letter)     | メール<br>(email)          | ふとん<br>(futon)    | 羽毛<br>(down)      | モラル<br>(moral)          | マナー<br>(manner)     |
| 電話<br>(phone)      | 会話<br>(conversation)    | まつり<br>(festival) | 花火<br>(fireworks) | ラジオ<br>(radio)          | エフエム<br>(FM)        |
| 道具<br>(tool)       | 工具<br>(industrial tool) | まぶた<br>(eyelid)   | 瞳<br>(pupil)      | ランチ<br>(lunch)          | ご飯<br>(rice)        |
| 道路<br>(road)       | 交通<br>(traffic)         | りんご<br>(apple)    | 青森<br>(Aomori)    | ワイン<br>(wine)           | フランス<br>(France)    |
| 野菜<br>(vegetables) | 果物<br>(fruit)           | わいろ<br>(bribe)    | 悪<br>(evil)       |                         |                     |

**Supplementary Table 1.** Final test results of each learning condition in Experiment 1.

|                                           | Mean | <i>SD</i> |
|-------------------------------------------|------|-----------|
| control                                   | 0.62 | 0.21      |
| single-delayed                            | 0.74 | 0.21      |
| multiple- delayed                         | 0.74 | 0.15      |
| single-immediate                          | 0.75 | 0.18      |
| multiple-immediate                        | 0.76 | 0.16      |
| result of pooling<br>retrieval conditions | 0.75 | 0.14      |

**Supplementary Table 2.** Final test results of each learning condition in Experiment 2.

|                                           | Mean | <i>SD</i> |
|-------------------------------------------|------|-----------|
| control                                   | 0.56 | 0.16      |
| immediate                                 | 0.73 | 0.16      |
| short-delay                               | 0.70 | 0.17      |
| long-delay                                | 0.68 | 0.19      |
| result of pooling<br>retrieval conditions | 0.70 | 0.16      |

**Supplementary Table 3.** Final test results of each learning condition in Experiment 3a.

---

|                                           | Mean | <i>SD</i> |
|-------------------------------------------|------|-----------|
| control                                   | 0.52 | 0.20      |
| single-delayed                            | 0.67 | 0.18      |
| multiple- delayed                         | 0.67 | 0.18      |
| single-immediate                          | 0.70 | 0.19      |
| multiple-immediate                        | 0.70 | 0.19      |
| result of pooling<br>retrieval conditions | 0.69 | 0.16      |

---

**Supplementary Table 4.** Final test results of each learning condition in Experiment 3b.

---

|                                           | Mean | <i>SD</i> |
|-------------------------------------------|------|-----------|
| control                                   | 0.57 | 0.18      |
| single-delayed                            | 0.67 | 0.20      |
| multiple- delayed                         | 0.61 | 0.18      |
| single-immediate                          | 0.66 | 0.18      |
| multiple-immediate                        | 0.73 | 0.16      |
| result of pooling<br>retrieval conditions | 0.66 | 0.15      |

---
